# Supplementary material for: Chitosan–gold nanoparticles as peroxidase mimic and their application in glucose detection in serum
Source: Royal Society of Chemistry journal article supplement (doi:10.1039/c7ra08967h), 2017-01-01
Supplement: c7ra08967h1.pdf [file c7ra08967h1.pdf]

Supporting information  
for  
**Chitosan-gold nanoparticles as peroxidase mimic and their application in glucose  
detection in serum**

Cuifeng Jiang\*, Jing Zhu, Zhao Li, Juhua Luo, Jinshan Wang, Yu Sun  
*School of Materials Science and Engineering, Yancheng Institute of Technology, Yancheng,  
Jiangsu, China, 224051 Email: cuifengj123@163.com*

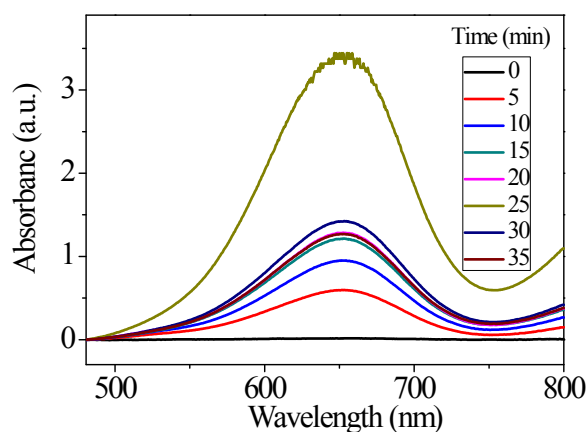

Figure S1. Absorbance spectrum of TMB+H<sub>2</sub>O<sub>2</sub> system in the presence of Chitosan-AuNPs generated at different reaction time.

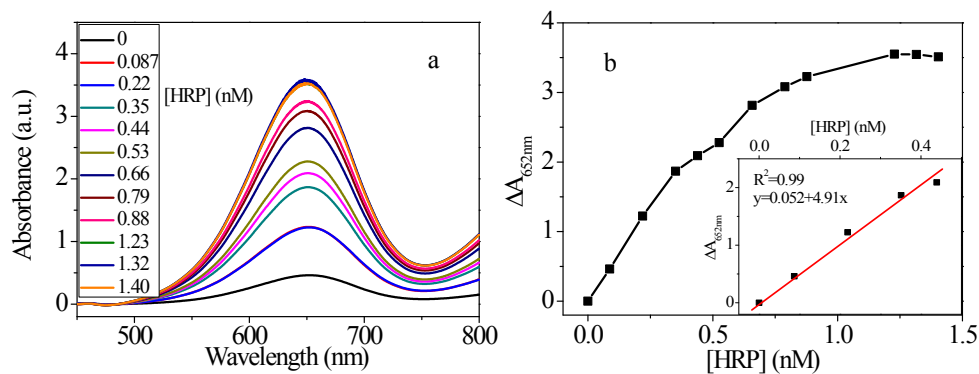

Figure S2. (a) Absorbance spectrum and (b)  $\Delta A$  of TMB+H<sub>2</sub>O<sub>2</sub> system in the presence of different concentration of HRP.

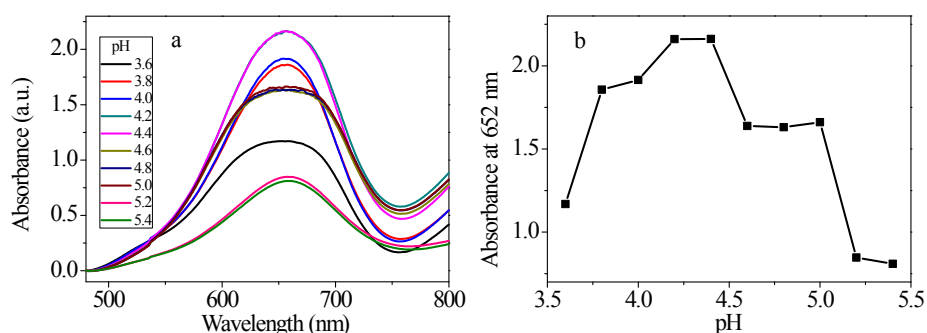

Figure S3. (a) Absorbance spectra of AuNPs+TMB+H<sub>2</sub>O<sub>2</sub> in acetate buffer with different pH (b) Absorbance at 652 nm vs pH .

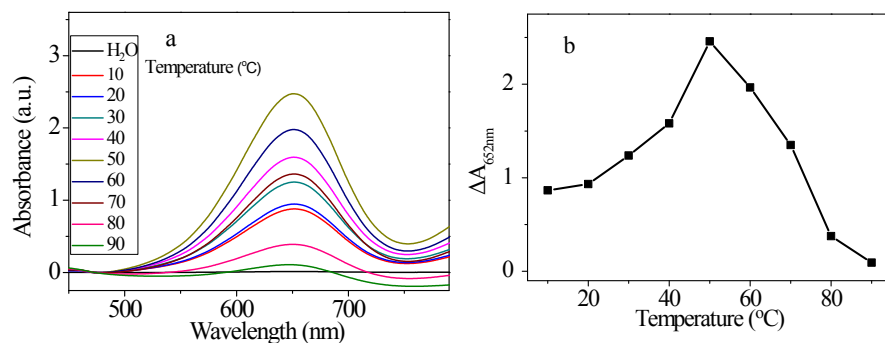

Figure S4. (a) Absorbance spectra of AuNPs+TMB+H<sub>2</sub>O<sub>2</sub> under different temperature and (b)  $\Delta A_{652nm}$  vs Temperature.

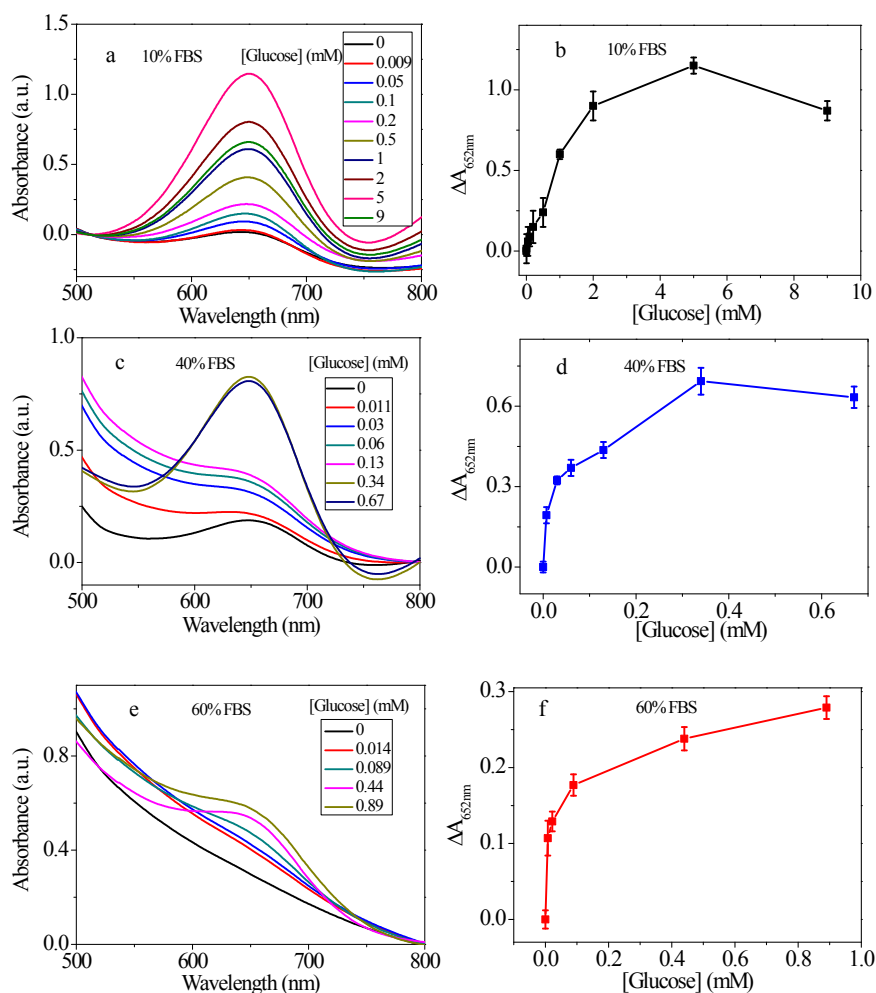

Figure S5. Absorbance spectra (a, c, e) and  $\Delta A_{652nm}$  vs [Glucose] (b, d, f) at different volume ratio (percentage) of serum (a, b) 10%, (c, d) 40%, (e, f) 60%
